# Supplementary material for: Inhibitory Effects of Polyphenol- and Flavonoid-Enriched Rice Seed Extract on Melanogenesis in Melan-a Cells via MAPK Signaling-Mediated MITF Downregulation
Source: MDPI journal article supplement (doi:10.3390/ijms241411841), 2023-07-24
Supplement: s1 [file ijms-2506977-supplementary.pdf › ijms-2506977-supplementary.pdf]

## Supplementary Materials

**Figure S1.** Schematic of breeding of the rice variety, ‘Sebok’.

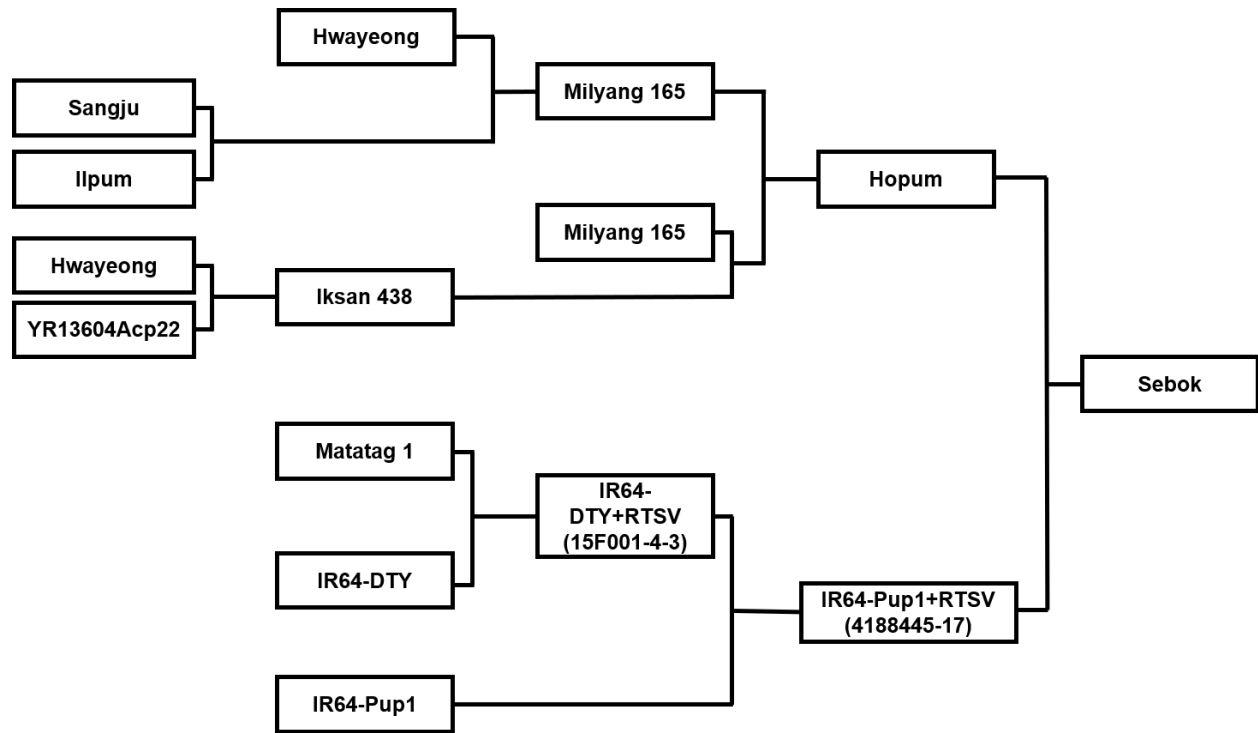

**Note:** To establish high-quality and multi-stress resistant rice varieties, the desirable phosphorus uptake 1 (*Pup1*), quantitative trait locus (QTL), and rice tungro virus resistance (*RTSV*) genes were introduced into Hopum, an elite *Japonica* variety known for its superior quality. The breeding approach involved several key steps. First, a promising individual, 15F1001-4-3, was selected from the  $F_3$  population derived from the cross between IR64-DTY (GID 4537776) and Matatag 1 (GID 4537724). Next, this individual was crossed with IR64-Pup1 (GID 4537756). Marker-assisted selection was used to identify individuals carrying the *Pup1* and *RTSV* genes. During the development of rice breeding lines, a colored line was observed in the dehulled rice. Further analysis revealed higher levels of polyphenols and flavonoids compared with Hopum. In  $BC_2F_7$ , a rice variety known as ‘Sebok’ was developed.

**Figure S2.** Standard curve of ascorbic acid (vitamin C).

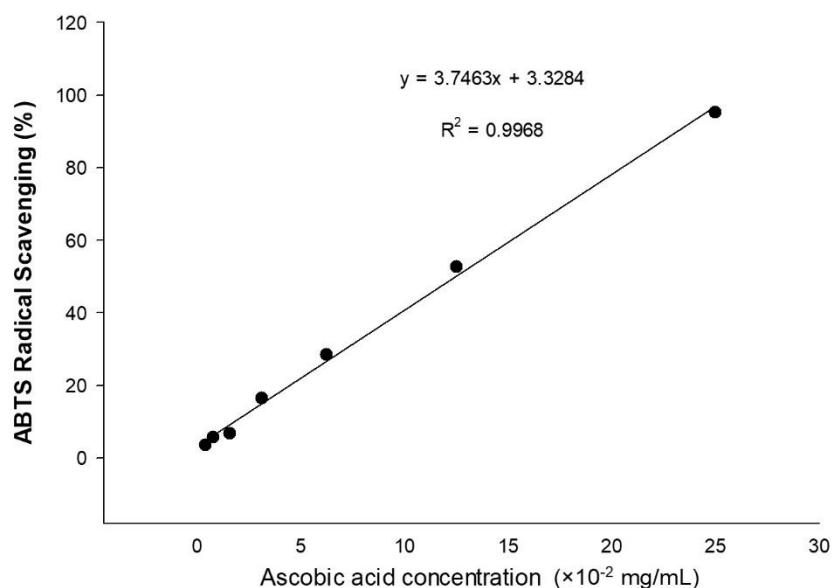

**Note:** The vitamin C standard curve was linear across a concentration range of 3.9065–250  $\mu\text{g/mL}$ . The regression equation is “ $y = 3.7463x + 3.3284$ ” ( $R^2 = 0.9968$ ); where y is the scavenging activity (%) value.

**Figure S3.** Calibration curve of tannic acid using for total polyphenols content evaluation

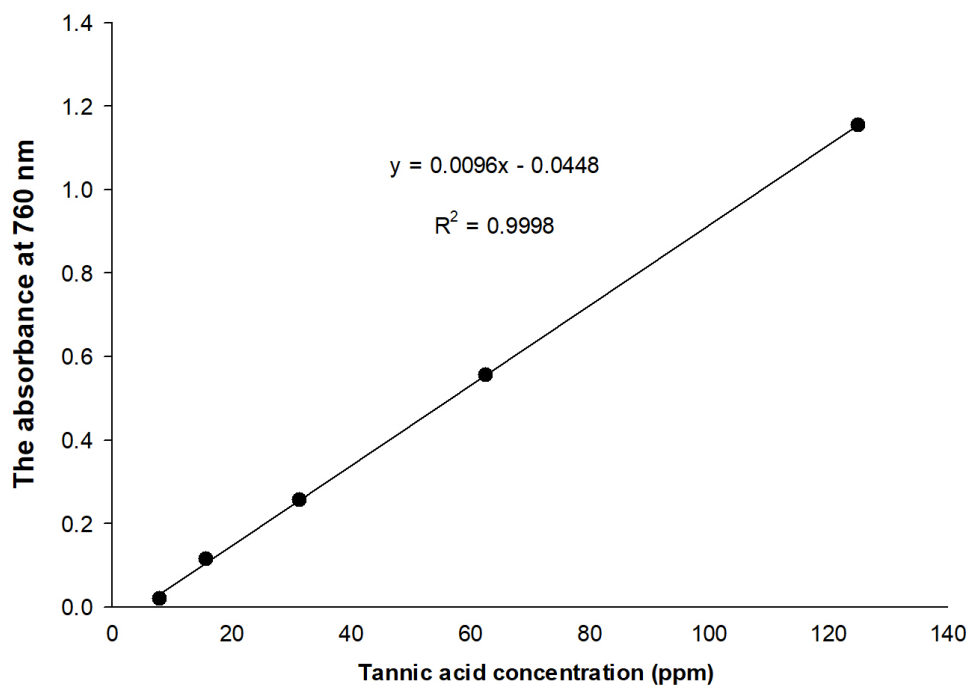

**Figure S4.** Calibration curve of quercetin using for total flavonoids content evaluation

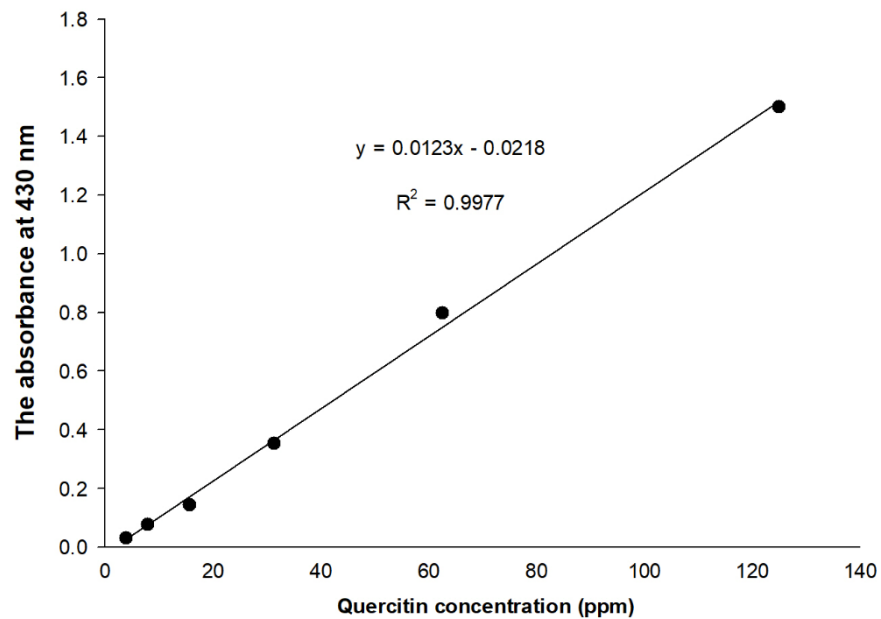

**Table S1.** Differentiated melan-a cell scoring

| Benchmark                                                                                                                       | Score |
|---------------------------------------------------------------------------------------------------------------------------------|-------|
| Cell size lower than 50 $\mu\text{m}$ and pigmentation lower than 50% of cytoplasmic area with a low distribution.              | 1+    |
| Cell size lower than 50 $\mu\text{m}$ and pigmentation equal or higher than 50% of cytoplasmic area with a higher distribution. | 2+    |
| Cell size larger than 51 $\mu\text{m}$ and pigmentation throughout the cytoplasmic area.                                        | 3+    |
| Cell size larger than 51 $\mu\text{m}$ and pigmentation densely packed throughout the cytoplasmic area.                         | 4+    |
